# Supplementary material
Source: Springer Nature journal article supplement (https://www.springermedizin.de/resource/supplementary/13643_2012_50_MOESM12_ESM.pdf/9681370)
Supplement: MOESM12 [file 9681370]

**Intervention  
Adaptation  
Activity**

```
graph LR; A[Intervention Adaptation Activity] --> B[Theorised Mechanism of Adaptation Activity]; B --> C[Anticipated Response to Adaptation Activity]; C <--> D[Potential Resistance to Adaptation Activity];
```

**Theorised  
Mechanism of  
Adaptation  
Activity**

**Anticipated  
Response to  
Adaptation  
Activity**

**Potential  
Resistance to  
Adaptation  
Activity**
